# Supplementary material for: Surface optimization to eliminate hysteresis for record efficiency planar perovskite solar cells
Source: Royal Society of Chemistry journal article supplement (doi:10.1039/c6ee02139e), 2016-01-01
Supplement: c6ee02139e1.pdf [file c6ee02139e1.pdf]

# Supporting Information

## Surface Optimization to Eliminate Hysteresis for Record Efficiency Planar Perovskite Solar Cells

Dong Yang,<sup>a</sup> Xin Zhou,<sup>c</sup> Ruixia Yang,<sup>b</sup> Zhou Yang,<sup>a</sup> Wei Yu,<sup>b</sup> Xiuli Wang,<sup>b</sup> Can Li,<sup>\*b</sup> Shengzhong (Frank) Liu<sup>\*a,b</sup> and

Robert P. H. Chang<sup>d</sup>

<sup>a</sup>Key Laboratory of Applied Surface and Colloid Chemistry, National Ministry of Education; Shaanxi Engineering Lab for Advanced Energy Technology, School of Materials Science and Engineering, Shaanxi Normal University, Xi'an 710119, China

<sup>b</sup>State Key Laboratory of Catalysis, Dalian National Laboratory for Clean Energy, Dalian Institute of Chemical Physics, Chinese Academy of Sciences, Dalian, 116023, China

<sup>c</sup>College of Environmental and Chemical Engineering, Dalian University, Dalian, 116622, China

<sup>d</sup>Department of Materials Science and Engineering, Argonne-Northwestern Solar Energy Research (ANSER) Center, Northwestern University, 2145 Sheridan Road, Evanston, Illinois 60208, USA

## Materials

CH<sub>3</sub>NH<sub>3</sub>I was synthesized and purified according to a reported procedure.<sup>1</sup> Methylamine (24 mL, 33 wt.% in absolute ethanol, Aldrich) and hydroiodic acid (10 mL, 57 wt.% in water, Aldrich) were mixed in 100 mL round-bottom flask at 0 °C for 2 hour with stirring. The precipitate was recovered by removing the solvents at 50 °C using a rotary evaporator. Re-dissolve the product in absolute ethanol, precipitate by adding certain amount of diethyl ether. After extraction filtration, the above steps were repeated for one more time to harvest pure CH<sub>3</sub>NH<sub>3</sub>I material. Finally, the solid product was dried at 60 °C in a vacuum oven for 24 hour. [6,6]-phenyl-C61-butyric acid methyl ester (PCBM, purity > 99.5%) was purchased from Solarmer Materials Inc. PTAA (Mn = 17.5 kg mol<sup>-1</sup>, PDI = 1.81) was purchased from EM index. The 1-butyl-3-methylimidazolium tetrafluoroborate ([BMIM]BF<sub>4</sub>, C<sub>8</sub>H<sub>15</sub>N<sub>2</sub>BF<sub>4</sub>, purity > 98.5%) and all of the solvents were purchased from Aldrich.

## Device fabrication

Glass/FTO was cleaned with acetone, isopropyl alcohol and deionized water successively in ultrasonic bath for 30 min, and then dried by flowing nitrogen gas. The TiO<sub>2</sub> films were sputtered on 33 × 33 mm<sup>2</sup> glass/FTO substrates at room temperature using 400 W for a 3-inch-diameter metallic plate of Ti (99.995%) in an atmosphere of Ar (99.998%) and O<sub>2</sub> (99.998%) by the PVD-75 vacuum system (Kurt J. Lesker, U.S.A), followed by annealing at 500 °C for 30 min. The thickness of the ~45 nm TiO<sub>2</sub> film was determined by a Bruker 150 surface profiler. The IL was dissolved in methanol with different concentration, and spin-coated onto the substrates at 5000 rpm, then annealed at 80 °C for 10 min in glovebox to remove the residual solvent. The perovskite films were deposited onto TiO<sub>2</sub> and m-TiO<sub>2</sub> substrates. Firstly, 150 nm thick PbCl<sub>2</sub> film was deposited onto the substrate by evaporation at about 310 °C. The deposition rate was maintained at ca. 1 Å s<sup>-1</sup> and substrates were kept at room temperature. The PbCl<sub>2</sub> samples were transferred into the nitrogen filled glovebox after cooling down to the room temperature, then the PbCl<sub>2</sub> samples were placed on a layer of CH<sub>3</sub>NH<sub>3</sub>I powder, then heated to 150 °C and maintained at the temperature for 20 min to ensure that all PbCl<sub>2</sub> was transformed into perovskite. The perovskite samples were transferred into a petri dish and cooled down to the room temperature. The sample was washed with 50 mL isopropanol, and dried by flowing nitrogen, then annealed at 70 °C for 5 min. The thickness of perovskite film was determined to be ~345 nm by the cross-section SEM (Fig. 2b). The PTAA solution was spin-coated onto the perovskite films at 3000 rpm for 30 s by using PTAA/toluene (10 mg/mL) with an addition of 7.5 μL tBP, and 7.5 μL of a solution of 170 mg/mL Li-TFSI in acetonitrile. The thickness of the PTAA film was determined to be ~60 nm by a Bruker 150 surface profiler. Finally, 80 nm of Au electrode was deposited using a thermal evaporator. It is worthwhile to note that the humidity was maintained below 40% for all preparation processes.

## Characterization

The  $J$ - $V$  performance of the PSCs were analyzed by Keithley 2400 source under ambient condition at room temperature, and the illumination intensity was  $100 \text{ mW cm}^{-2}$  (AM 1.5G Oriel solar simulator). The power output of lamp was calibrated by a NREL-traceable KG5 filtered silicon reference cell. The device area of  $0.1134 \text{ cm}^2$  is defined by a metal aperture to avoiding light scattering from the metal electrode into the device during the measurement. The champion device based on m-TiO<sub>2</sub> characterized under delay time changed from 10 ms to 600 ms per step, measurement time from 6 s to 360 s using both forward and reverse scan directions. The EQE was characterized on the QTest Station 2000ADI system (CrownTech, Inc., USA), and the light source is a 300 W xenon lamp. The monochromatic light intensity for EQE was calibrated with a reference silicon photodiode. AFM height images were obtained with a Bruker Metrology Nanoscope III-D atomic force microscope in tapping mode. The work function of samples was measured by KPFM with a Bruker Metrology Nanoscope VIII AFM. Conducting AFM tips (SCM-PIT/PtIr, Bruker, USA) used for this study had a typical spring constant of  $2.8 \text{ N m}^{-1}$  and a resonance frequency of 75 kHz. Typical scan line frequency was 0.3 Hz and each image contained  $512 \times 512$  pixels. The TRPL spectra were acquired with the time-correlated single photon counting method with an Edinburgh Instruments FLS920 fluorescence spectrometer. The excitation source is a picosecond pulsed diode laser at 406.8 nm with a pulse width of 64.2 ps. All decays were measured with a 4096-channel analyzer. The SEM images were taken by a Quanta 200F microscope (FEI Company) with an accelerating voltage of 20 kV. XRD patterns were measured on a Rigaku diffractometer equipped with a Cu K $\alpha$  radiation source. XPS measurements were performed in a VG ESCALAB MK2 system with a monochromatized Al K $\alpha$  under a pressure of  $5.0 \times 10^{-7} \text{ Pa}$ . The reflection and transmission were acquired by a Varian UV-vis spectrometer, Cary 5000.

### **Work function of the TiO<sub>2</sub> and m-TiO<sub>2</sub> samples**

The work function of the  $\text{TiO}_2$  and m- $\text{TiO}_2$  are characterized by KPFM through probing the difference surface potential (SP) between Pt/Ir-coated tip and the samples.<sup>2,3</sup> The different SP is defined as the following Eq. (1):

$$e \times SP = WF_t - WF_s \quad (1)$$

where  $e$  is the elementary charge of electron,  $WF_s$  is the work function of sample surface, and  $WF_t$  is the work function of Pt/Ir-coated tip.  $WF_t$  is calibrated using highly ordered pyrolytic graphite (HOPG) with 4.60 eV of constant work function. Finally, the work function of sample is calculated using Eq. (2):

$$WF_s = 4.6 + e(SP_{HOPG} - SP_s) \quad (2)$$

The  $2 \times 2 \mu\text{m}^2$  scan area is measured on both HOPG and the samples, and the mean distribution of surface potential is employed as the sample SP. The SP of HOPG,  $\text{TiO}_2$  and m- $\text{TiO}_2$  samples are 15 mV, 356 mV and 603 mV, respectively as shown in Fig. S2. Therefore, the work function of the  $\text{TiO}_2$  and m- $\text{TiO}_2$  are 4.26 and 4.01 eV, respectively.

### Electron mobility of $\text{TiO}_2$ and m- $\text{TiO}_2$

Electron-only devices (FTO/PCBM/ETL/PCBM/Ag) were fabricated to calculate the electron mobility of the samples, including  $\text{TiO}_2$  and m- $\text{TiO}_2$ , by the SCLC.<sup>4,5</sup> The PCBM solution was prepared in chlorobenzene with a concentration of 20 mg/mL, and spin-coated on FTO surface at 3000 rpm, then annealed at 100 °C for 15 min in a glovebox. The  $\text{TiO}_2$  and m- $\text{TiO}_2$  were deposited on PCBM surface. Sequentially, the PCBM films were fabricated on previous samples surface, then annealed at 100 °C for 15 min in a glovebox. The 100 nm-thick Ag were deposited with a shadow mask. The dark  $J$ - $V$  characteristics of the electron-only devices were measured by a Keithley 2400 source. The mobility is extracted by fitting the  $J$ - $V$  curves by the Mott-Gurney Eq. (3):

$$J = \frac{9}{8} \varepsilon_0 \varepsilon_r \mu_e \frac{(V_{app} - V_r - V_{bi})^2}{L^3} \quad (3)$$

Where  $J$  is the current density,  $\varepsilon_0$  is the vacuum permittivity,  $\varepsilon_r$  is the dielectric permittivity of the ETL

materials,  $L$  is the thickness of the ETL film,  $V_{app}$  is the applied voltage of the device,  $V_r$  is the voltage drop due to constant resistance and series resistance across the electrodes,<sup>4</sup>  $V_{bi}$  is the built-in voltage due to the different work function of the two electrodes, and  $\mu_e$  is the electron mobility. The  $\mu_e$  is calculated from the currents in the square law region. The electron mobility of  $3.83 \times 10^{-4}$  and  $1.36 \times 10^{-3} \text{ cm}^2 \text{ V}^{-1} \text{ s}^{-1}$  for the  $\text{TiO}_2$  and m- $\text{TiO}_2$  are calculated from the currents in the square law region, respectively.

### Theoretical calculation

All theoretical calculations were performed with the Vienna ab initio simulation package (VASP) and projector augmented wave (PAW) method.<sup>6-9</sup> The wave function was expanded by plane wave with kinetic cutoff of 400 eV. The generalized gradient approximation (GGA) with the spin-polarized Perdew-Burke-Ernzerhof (PBE) function was used for all calculations.<sup>10</sup> The bonding energy is calculated using Eq. (4):

$$E_b = E_{tot} - E_{sur} - E_{mol} \quad (4)$$

Where  $E_{tot}$  is the total energy of the system studied,  $E_{sur}$  the energy of a clean surface, and  $E_{mol}$  the energy of free IL. The negative bonding energy signifies that the chemisorption structure is stable. The minimum energy  $E_{tot}$  for different species adsorbed on the perovskite and the  $\text{TiO}_2$  surface were determined by relaxing various initial structures. The binding energies for  $[\text{BF}_4]^-$  group adsorbed on  $\text{TiO}_2$  and on the perovskite surface are -1.24 eV and 1.86 eV, respectively, as shown in Fig S5a and S5b, meaning that  $[\text{BF}_4]^-$  tend to bond to the  $\text{TiO}_2$  surface, rather than to the perovskite layer. Likewise, the binding energies for the adsorbed on  $\text{TiO}_2$  and the perovskite surfaces are -1.63 eV and -3.57 eV, respectively as shown in Fig S5c and S5d, implying that the  $[\text{BMIM}]^+$  is in favor of bonding to the perovskite rather than the  $\text{TiO}_2$  surface. The computational results reveal that the IL bonds to both the  $\text{TiO}_2$  surface and the perovskite layer due to its strong ionic functional groups.

## References

- 1 N. J. Jeon, J. H. Noh, Y. C. Kim, W. S. Yang, S. Ryu and S. Seok, *Nat. Mater.*, **2014**, *13*, 897.
- 2 W. Melitz, J. Shen, S. Lee, J. S. Lee, A. C. Kummel, R. Droopad and E. T. Yu, *J. Appl. Phys.*, **2010**, *108*, 023711.
- 3 L. Zhou, D. Yang, W. Yu, J. Zhang and C. Li, *Org. Electron.*, **2015**, *23*, 110.
- 4 S. Park, J. H. Heo, C. H. Cheon, H. Kim, S. H. Im and H. J. Son, *J. Mater. Chem. A*, **2015**, *3*, 24215.
- 5 G. G. Malliaras, J. R. Salem, P. J. Brock and C. Scott, *Phys. Rev. B*, **1998**, *58*, 13411.
- 6 G. Kesse and J. J. Furthmüller, *Phys. Rev. B*, **1996**, *54*, 11169.
- 7 G. Kesse and J. Furthmüller, *Comput. Mater. Sci.*, **1996**, *6*, 15.
- 8 Blöchl, *P. Phys. Rev. B*, **1994**, *50*, 17953.
- 9 G. Kresse and D. Joubert, *Phys. Rev. B*, **1999**, *59*, 1758.
- 10 J. P. Pre dew, K. Burke, and M. Ernzerhof, *Phys. Rev. Lett.*, **1996**, *77*, 3865.

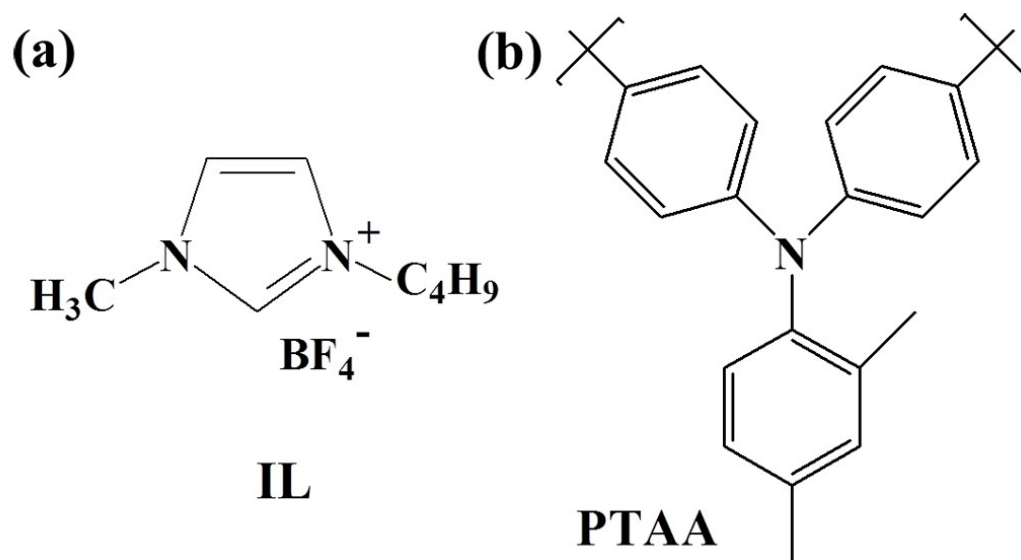

Scheme S1. Chemical structures of (a) 1-butyl-3-methylimidazolium tetrafluoroborate and (b) PTAA molecules.

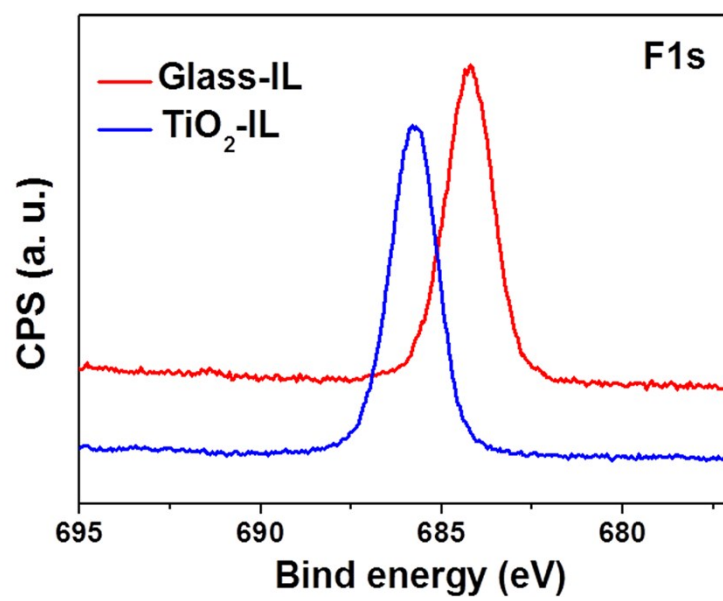

Fig. S1. XPS focus on the F1s peaks for glass-IL and TiO<sub>2</sub>-IL samples.

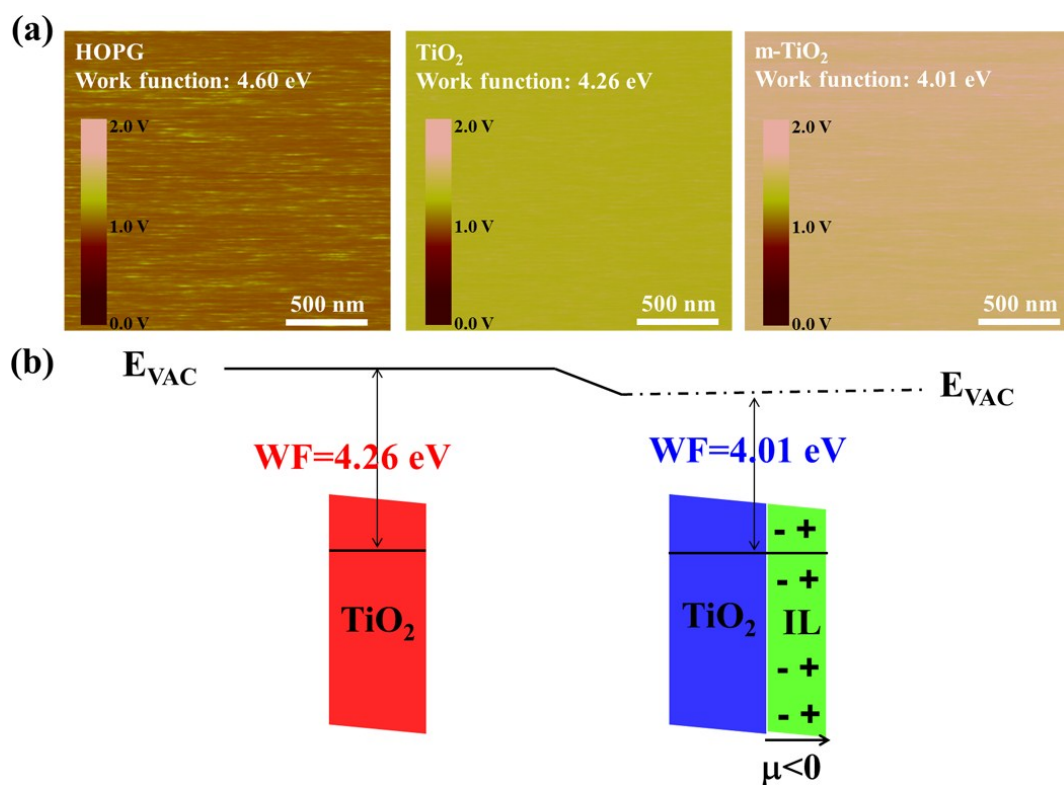

Fig. S2. (a) Surface potential images of HOPG, TiO<sub>2</sub> and m-TiO<sub>2</sub>. The surface potential images are original data without further processing. (b) Illustration of vacuum level shift and reduced work function of TiO<sub>2</sub> after the IL modification.

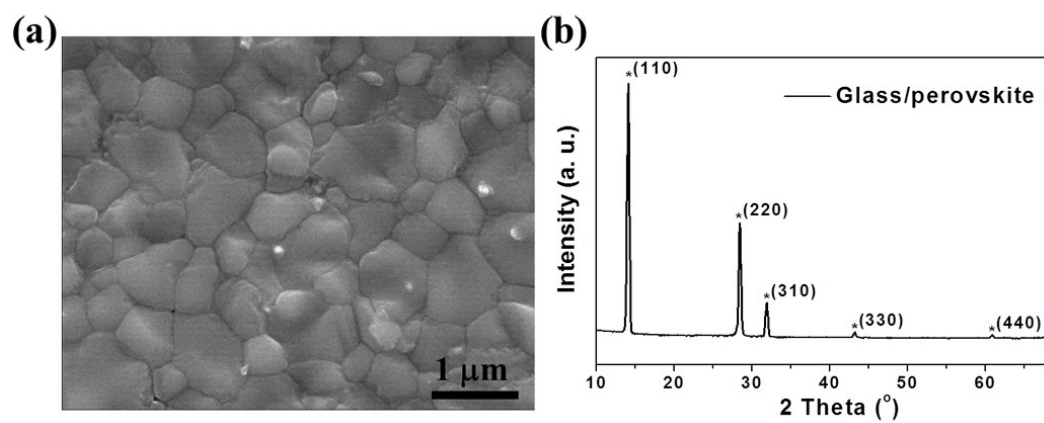

Fig. S3. (a) Top-view SEM image of the perovskite film. (b) XRD spectrum of the perovskite film.

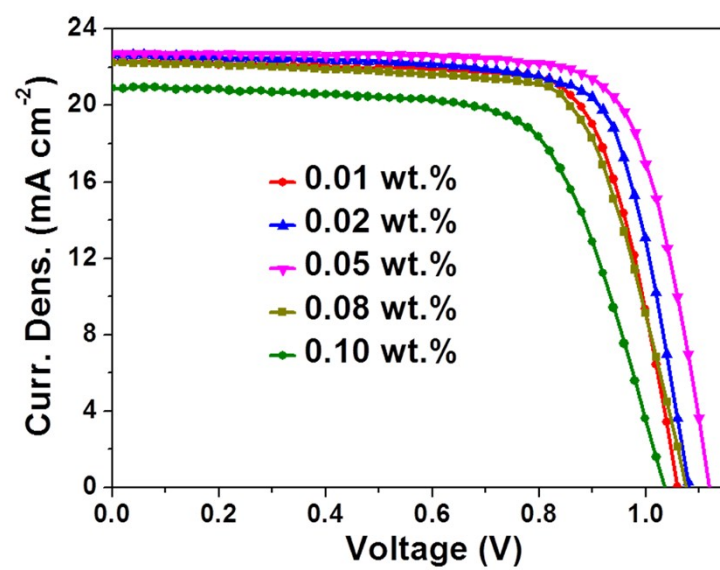

Fig. S4.  $J-V$  characteristics of the PSCs with different IL concentration to modify TiO<sub>2</sub>.

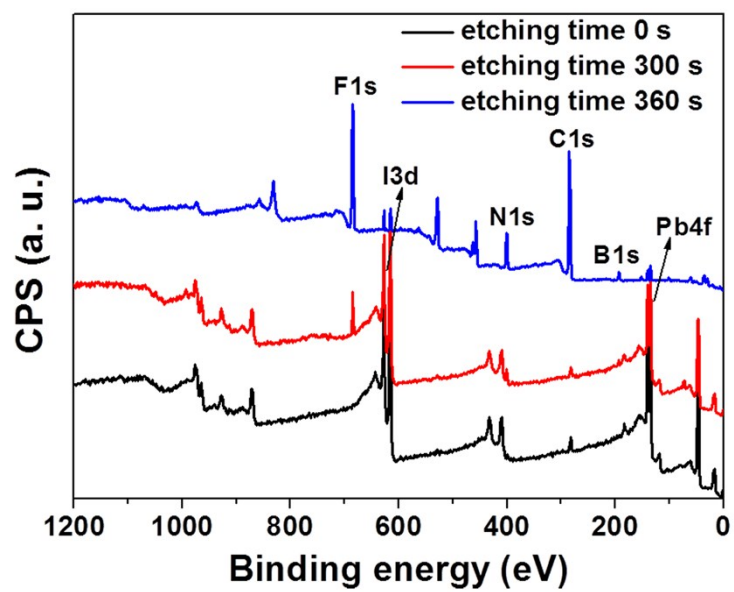

Fig. S5. XPS spectra of the m-TiO<sub>2</sub>/CH<sub>3</sub>NH<sub>3</sub>PbI<sub>3</sub> film at the etching time of 0, 300 and 360 seconds.

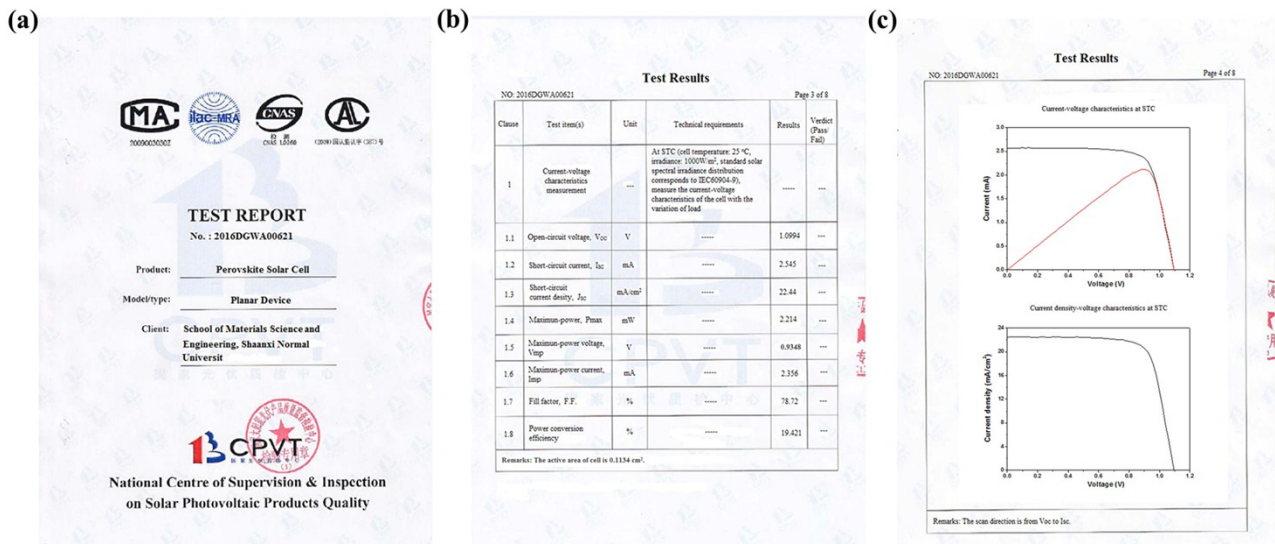

Fig. S6. (a) Cover page of certified report by CPVT on PSC with m-TiO<sub>2</sub> ETL. (b) List of the parameters for device. (c) I-V, power output and J-V curves of the PSC based on m-TiO<sub>2</sub>.

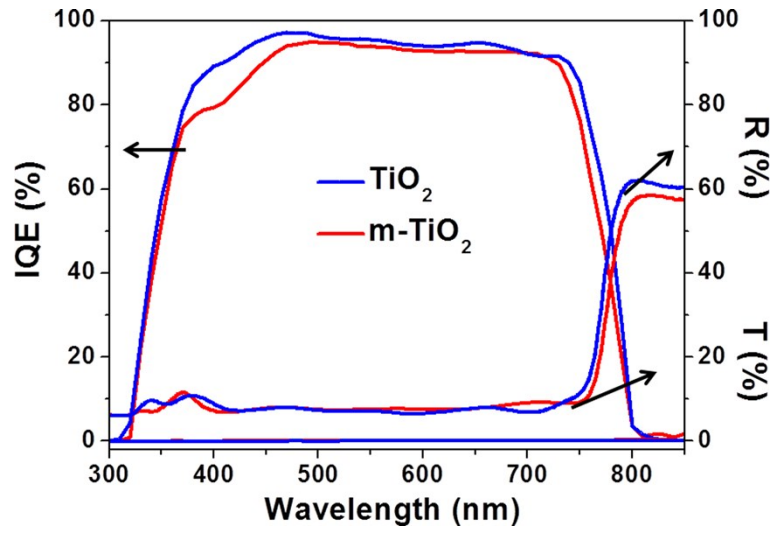

Fig. S7. The IQE, reflection and transmission spectra of PSCs with  $\text{TiO}_2$  and  $\text{m-TiO}_2$  as ETLs. The IQE is calculated from EQE, reflection and transmission spectra using the Eq. 
$$IQE = \frac{EQE}{1 - R_{loss} - T_{loss}}$$
, where  $R_{loss}$  is reflection loss of device and  $T_{loss}$  is transmission loss of device. It is clear that the IQE of  $\text{m-TiO}_2$  and  $\text{TiO}_2$  for device at  $\sim 450$  nm are 98.7% and 94.9%, respectively.

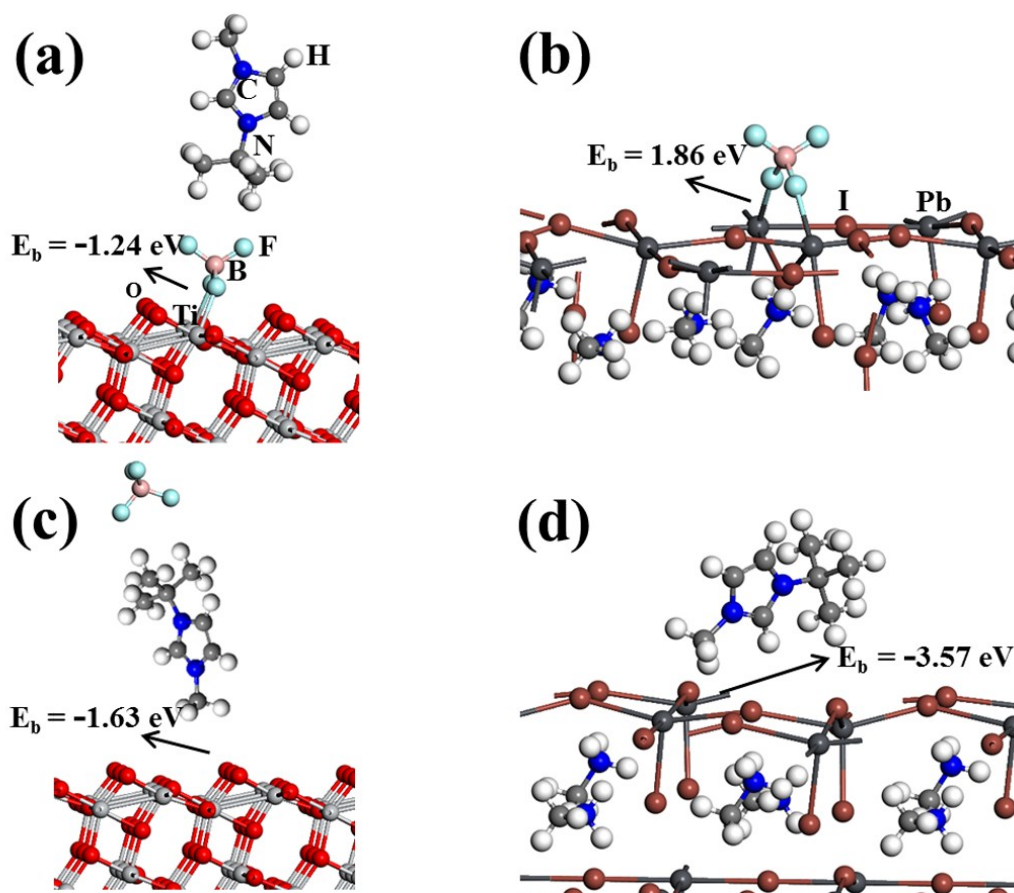

Fig. S8. Minimum energy adsorption geometry of  $[\text{BF}_4]^-$  on  $\text{TiO}_2$  (a) and perovskite (b). Minimum energy adsorption geometry of  $[\text{BMIM}]^+$  on  $\text{TiO}_2$  (c) and perovskite (d). The red, silver, light gray, dark gray, blue, light blue, pink, brown and white balls represent O, Ti, C, Pb, N, F, B, I and H atoms, respectively.

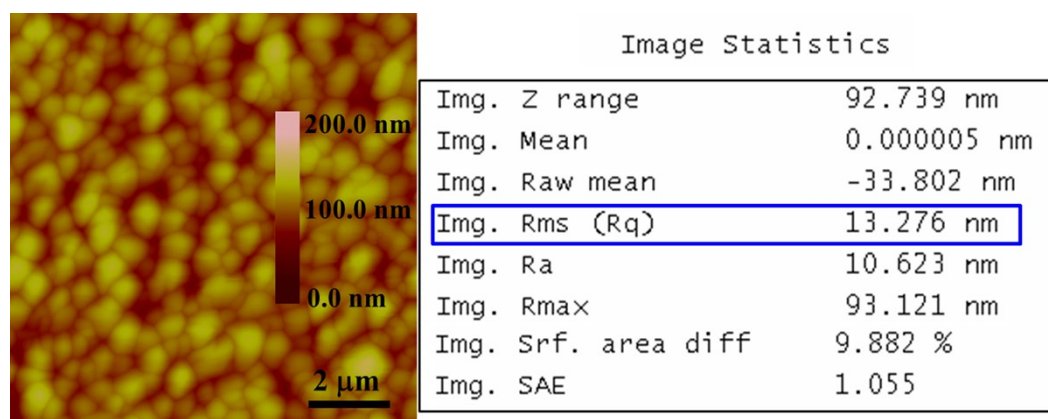

Fig. S9. AFM height image and surface roughness of the perovskite film based on m-TiO<sub>2</sub>.

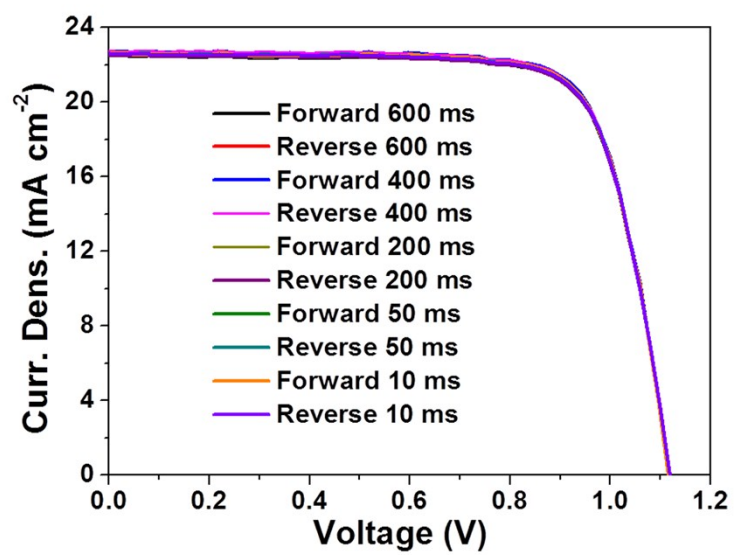

Fig. S10. The  $J$ - $V$  curves of a PSC based on m-TiO<sub>2</sub> ETL at different scan conditions.

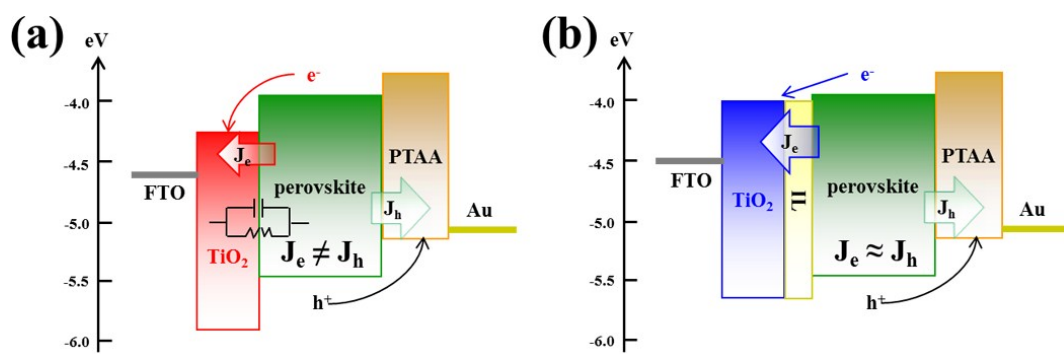

Fig. S11. Carrier transport mechanism of the PSCs employing (a) TiO<sub>2</sub> and (b) m-TiO<sub>2</sub> as ETLs.

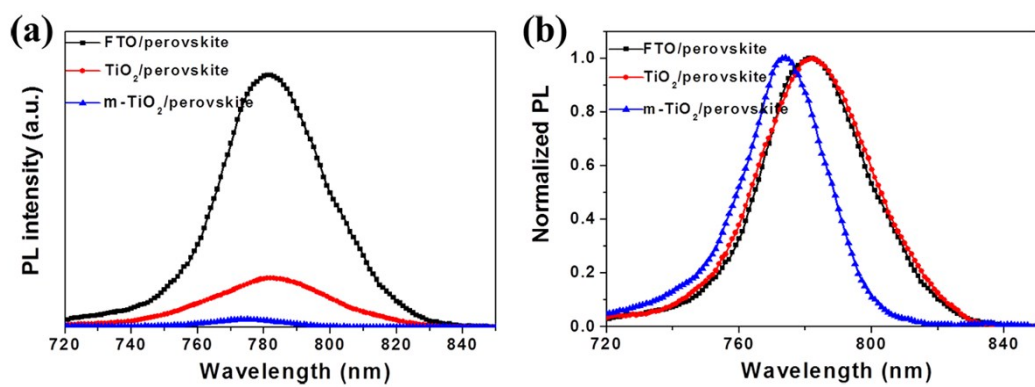

Fig. S12. Steady state PL (a) and normalized PL (b) spectra of FTO/perovskite,  $\text{TiO}_2$ /perovskite and m- $\text{TiO}_2$ /perovskite films.

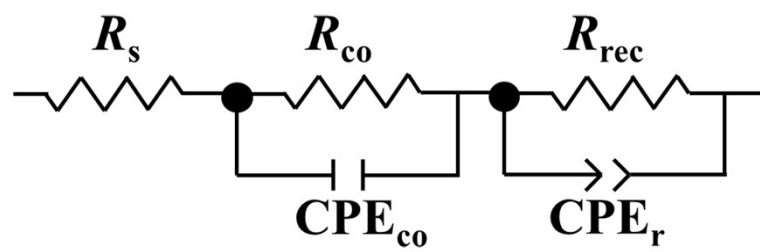

Fig. S13. The equivalent circuit model for PSCs in EIS.

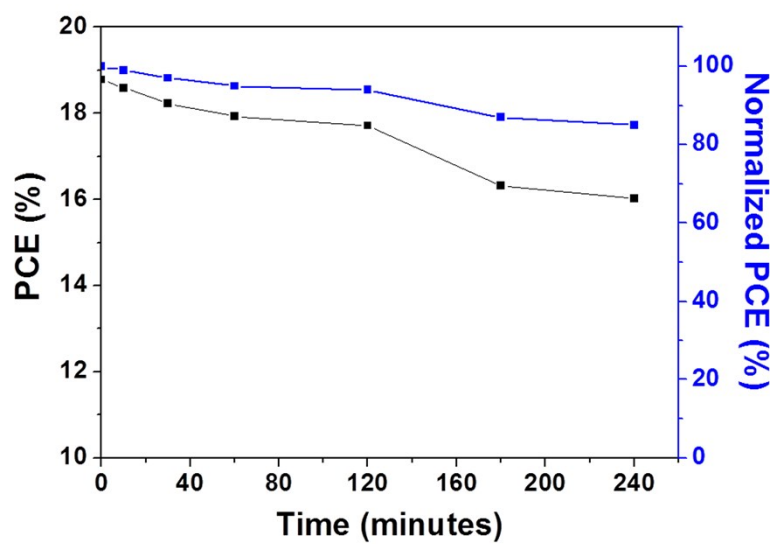

Fig. S14. The PCE stability of a PSC based on m-TiO<sub>2</sub> without any encapsulation under AM 1.5G illumination in ambient conditions.

Table S1. The parameters of PSCs with different IL concentration to modify TiO<sub>2</sub>.

| IL<br>concentration | $J_{sc}$ (mA cm <sup>-2</sup> ) | $V_{oc}$ (V) | FF   | PCE (%) | $R_s$ ( $\Omega$ ) | $R_{sh}$ (k $\Omega$ ) |
|---------------------|---------------------------------|--------------|------|---------|--------------------|------------------------|
| 0.01%               | 22.25                           | 1.06         | 0.75 | 17.69   | 53                 | 8.76                   |
| 0.02%               | 22.66                           | 1.08         | 0.75 | 18.36   | 42                 | 8.97                   |
| 0.05%               | 22.75                           | 1.12         | 0.77 | 19.62   | 34                 | 10.62                  |
| 0.08%               | 22.25                           | 1.06         | 0.73 | 17.22   | 52                 | 7.46                   |
| 0.10%               | 20.91                           | 1.02         | 0.69 | 14.72   | 66                 | 6.17                   |

Table S2. The parameters of PSCs with TiO<sub>2</sub> as ETLs.

| Devices | $J_{sc}$ (mA cm <sup>-2</sup> ) | $V_{oc}$ (V) | FF          | PCE (%)      |
|---------|---------------------------------|--------------|-------------|--------------|
| 1       | 20.55                           | 1.05         | 0.73        | 15.75        |
| 2       | 20.32                           | 1.03         | 0.72        | 15.07        |
| 3       | 20.75                           | 1.04         | 0.71        | 15.32        |
| 4       | 21.05                           | 1.02         | 0.70        | 15.03        |
| 5       | 20.05                           | 1.04         | 0.75        | 15.64        |
| 6       | 21.38                           | 1.02         | 0.68        | 14.83        |
| 7       | 21.04                           | 1.05         | 0.71        | 15.69        |
| 8       | 20.56                           | 1.04         | 0.74        | 15.82        |
| 9       | 20.67                           | 1.02         | 0.70        | 14.76        |
| 10      | 20.18                           | 1.03         | 0.73        | 15.17        |
| 11      | 20.77                           | 1.06         | 0.70        | 15.41        |
| 12      | 20.37                           | 1.02         | 0.68        | 14.13        |
| 13      | 21.04                           | 1.05         | 0.73        | 16.13        |
| 14      | 19.77                           | 1.04         | 0.69        | 14.19        |
| 15      | 20.06                           | 1.05         | 0.76        | 16.01        |
| 16      | 20.19                           | 1.04         | 0.71        | 14.91        |
| 17      | 21.37                           | 1.04         | 0.74        | 16.45        |
| 18      | 20.11                           | 1.03         | 0.74        | 15.33        |
| 19      | 21.27                           | 1.04         | 0.74        | 16.37        |
| 20      | 19.40                           | 1.06         | 0.73        | 15.01        |
| 21      | 20.54                           | 1.03         | 0.70        | 14.81        |
| 22      | 20.66                           | 1.06         | 0.72        | 15.77        |
| 23      | 19.83                           | 1.03         | 0.69        | 14.09        |
| 24      | 19.69                           | 1.05         | 0.74        | 15.30        |
| 25      | 21.27                           | 1.04         | 0.72        | 15.93        |
| 26      | 20.05                           | 1.06         | 0.71        | 15.09        |
| 27      | 20.58                           | 1.05         | 0.72        | 15.56        |
| 28      | 19.94                           | 1.04         | 0.73        | 15.14        |
| Average | 20.48 ± 0.54                    | 1.04 ± 0.01  | 0.72 ± 0.02 | 15.31 ± 0.68 |

Table S3. The parameters of PSCs based on m-TiO<sub>2</sub>.

| Devices | $J_{sc}$ (mA cm <sup>-2</sup> ) | $V_{oc}$ (V) | FF          | PCE (%)      |
|---------|---------------------------------|--------------|-------------|--------------|
| 1       | 22.42                           | 1.06         | 0.76        | 18.06        |
| 2       | 22.17                           | 1.06         | 0.75        | 17.63        |
| 3       | 22.45                           | 1.08         | 0.76        | 18.43        |
| 4       | 22.13                           | 1.08         | 0.75        | 17.92        |
| 5       | 22.35                           | 1.08         | 0.77        | 18.58        |
| 6       | 22.10                           | 1.07         | 0.72        | 17.03        |
| 7       | 22.32                           | 1.08         | 0.72        | 17.36        |
| 8       | 21.79                           | 1.08         | 0.74        | 17.41        |
| 9       | 22.35                           | 1.06         | 0.76        | 18.01        |
| 10      | 21.75                           | 1.08         | 0.73        | 17.15        |
| 11      | 21.25                           | 1.08         | 0.75        | 17.21        |
| 12      | 22.23                           | 1.08         | 0.76        | 18.25        |
| 13      | 22.49                           | 1.08         | 0.75        | 18.21        |
| 14      | 21.96                           | 1.09         | 0.73        | 17.47        |
| 15      | 22.05                           | 1.08         | 0.76        | 18.10        |
| 16      | 22.32                           | 1.08         | 0.73        | 17.60        |
| 17      | 22.21                           | 1.10         | 0.77        | 18.81        |
| 18      | 22.13                           | 1.08         | 0.75        | 17.43        |
| 19      | 22.09                           | 1.08         | 0.76        | 18.13        |
| 20      | 22.57                           | 1.10         | 0.76        | 18.86        |
| 21      | 22.67                           | 1.10         | 0.77        | 19.20        |
| 22      | 22.75                           | 1.12         | 0.77        | 19.62        |
| 23      | 22.62                           | 1.08         | 0.77        | 18.81        |
| 24      | 22.44                           | 1.08         | 0.75        | 18.18        |
| 25      | 22.96                           | 1.09         | 0.74        | 18.52        |
| 26      | 22.35                           | 1.09         | 0.75        | 18.27        |
| 27      | 22.22                           | 1.08         | 0.76        | 18.24        |
| 28      | 22.63                           | 1.07         | 0.75        | 18.16        |
| 29      | 22.43                           | 1.08         | 0.76        | 18.41        |
| 30      | 22.19                           | 1.08         | 0.76        | 18.21        |
| 31      | 22.42                           | 1.08         | 0.74        | 17.92        |
| 32      | 22.93                           | 1.10         | 0.76        | 19.17        |
| 33      | 22.35                           | 1.08         | 0.75        | 18.10        |
| 34      | 21.90                           | 1.07         | 0.76        | 17.81        |
| 35      | 22.49                           | 1.08         | 0.76        | 18.46        |
| 36      | 22.70                           | 1.08         | 0.75        | 18.39        |
| Average | 22.31 ± 0.34                    | 1.08 ± 0.01  | 0.75 ± 0.02 | 18.14 ± 0.58 |

Table S4. Parameters of the TRPL spectroscopy based on the FTO/perovskite, TiO<sub>2</sub>/perovskite and m-TiO<sub>2</sub>/perovskite.

| Samples                        | $\tau_{\text{ave}}$ (ns) | $\tau_1$ (ns) | $\tau_2$ (ns) | % of $\tau_1$ | % of $\tau_2$ |
|--------------------------------|--------------------------|---------------|---------------|---------------|---------------|
| FTO/perovskite                 | 25.24                    | 36.06         | 11.92         | 28.97         | 71.03         |
| TiO <sub>2</sub> /perovskite   | 11.46                    | 19.34         | 1.63          | 9.50          | 90.50         |
| m-TiO <sub>2</sub> /perovskite | 7.09                     | 13.15         | 1.02          | 7.21          | 92.79         |

Table S5. EIS parameters for the PSCs based on TiO<sub>2</sub> and m-TiO<sub>2</sub>.

| Substrates         | $R_s$ ( $\Omega$ ) | $R_{co}$ ( $\Omega$ ) | $R_{rec}$ ( $\Omega$ ) | $CPE_{co}$ -T<br>(F) | $CPE_{co}$ -P | $CPE_r$ -T<br>(F)     | $CPE_r$ -P |
|--------------------|--------------------|-----------------------|------------------------|----------------------|---------------|-----------------------|------------|
| TiO <sub>2</sub>   | 38.8               | 82.6                  | 229.4                  | $3.6 \times 10^{-9}$ | 1.17          | $2.5 \times 10^{-8}$  | 1.04       |
| m-TiO <sub>2</sub> | 36.5               | 64.7                  | 468.5                  | $6.3 \times 10^{-9}$ | 1.14          | $1.79 \times 10^{-8}$ | 1.05       |
